# Supplementary material for: Zinc finger transcription factor Egf1 promotes non-alcoholic fatty liver disease
Source: PubMed Central journal article supplement — JHEP Rep. 2023 Mar 9;5(6):100724. doi: 10.1016/j.jhepr.2023.100724 (PMC10206499; doi:10.1016/j.jhepr.2023.100724), 2023-03-09
Supplement: mmc1.pdf [file mmc1.pdf]

# Zinc finger transcription factor Egf1 promotes non-alcoholic fatty liver disease

Yan Guo, Xiulian Miao, Xinyue Sun, Luyang Li, Anqi Zhou, Xi Zhu, Yong Xu, Qinghua Wang, Zilong Li, Zhiwen Fan

## Table of contents

|               |         |
|---------------|---------|
| Fig. S1.....  | Page 2  |
| Fig. S2.....  | Page 3  |
| Fig. S3.....  | Page 4  |
| Fig. S4.....  | Page 5  |
| Fig. S5.....  | Page 6  |
| Fig. S6.....  | Page 7  |
| Fig. S7.....  | Page 8  |
| Fig. S8.....  | Page 9  |
| Fig. S9.....  | Page 10 |
| Fig. S10..... | Page 11 |
| Fig. S11..... | Page 12 |
| Fig. S12..... | Page 13 |
| Fig. S13..... | Page 14 |
| Fig. S14..... | Page 15 |
| Fig. S15..... | Page 16 |

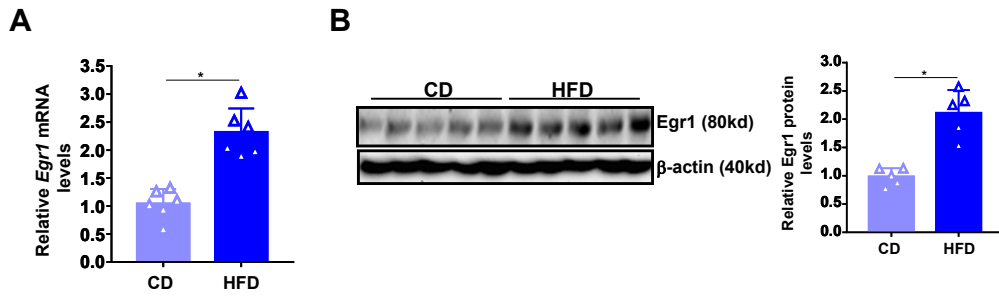

**Fig. S1:** (A, B) C57/B6 mice were fed on a high-fat diet (HFD) or a control diet (CD) for 12 weeks. *Egr1* expression was examined by qPCR and western blotting. N=6 mice for each group.

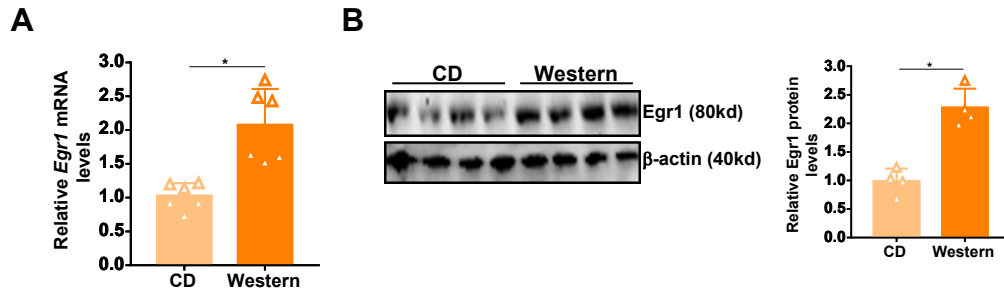

**Fig. S2: (A, B)** *Apo<sup>e</sup>-/-* mice were fed on a Western diet or a control diet (CD) for 7 weeks. Egr1 expression was examined by qPCR and western blotting. N=6 mice for each group.

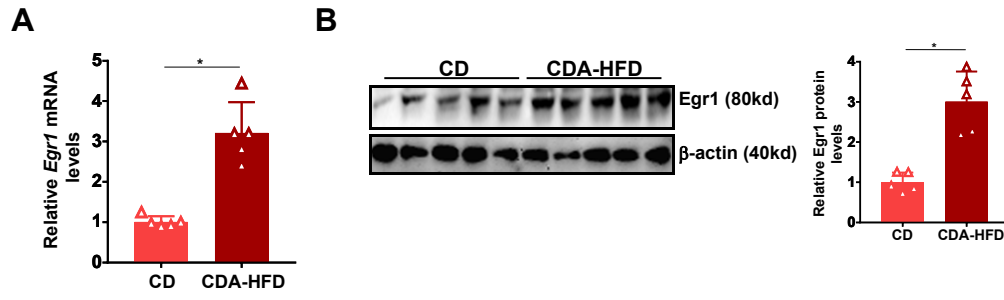

**Fig. S3:** (A, B) C57/B6 mice were fed on CDA-HFD or a control diet (CD) for 8 weeks. Egr1 expression was examined by qPCR and western blotting. N=6 mice for each group.

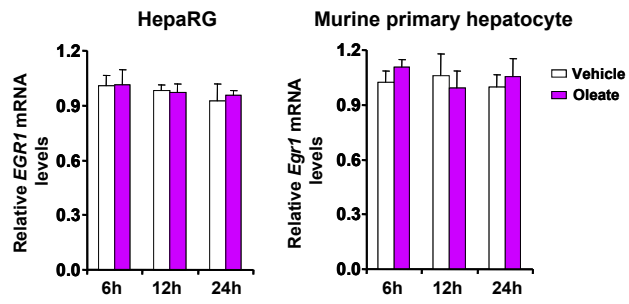

**Fig. S4:** HepaRG cells and primary murine hepatocytes were treated with or without oleate (0.2mM). EGR1 expression was examined by qPCR.

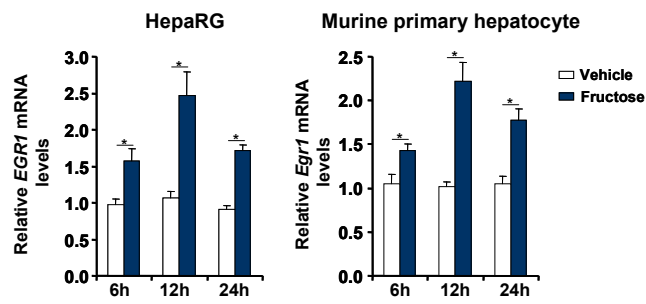

**Fig. S5:** HepaRG cells and primary murine hepatocytes were treated with or without fructose (10mM). EGR1 expression was examined by qPCR.

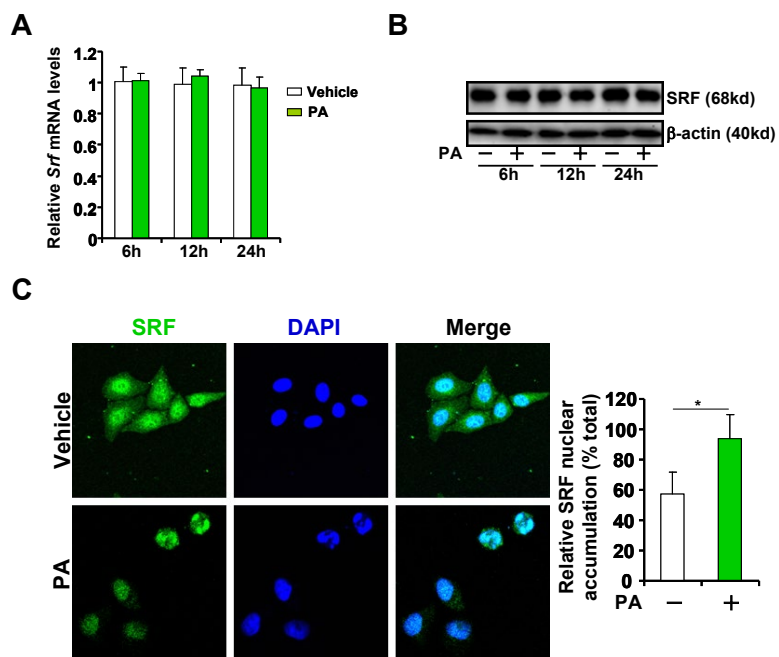

**Fig. S6: (A-C)** Primary hepatocytes were treated with or without palmitate (PA, 0.2mM). SRF expression was examined by qPCR (A) and western blotting (B). SRF sub-cellular localization was examined by immunofluorescence staining (C).

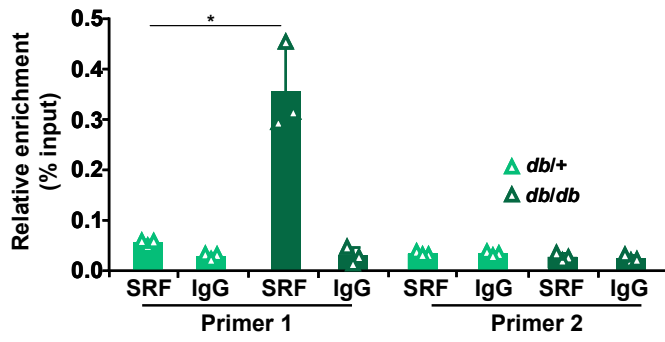

**Fig. S7:** ChIP assay was performed with anti-SRF or IgG using liver lysates from *db/db* mice and *db/+* mice.



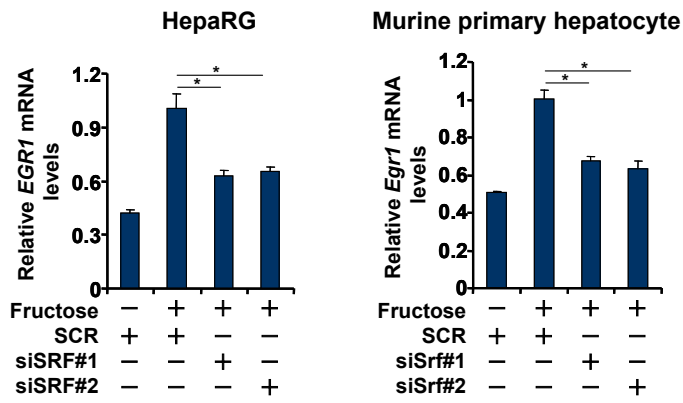

**Fig. S8:** HepaRG cells and primary murine hepatocytes were transfected with siRNA targeting SRF or scrambled siRNAs (SCR) followed by treatment with fructose (10mM). Egr1 expression was examined by qPCR

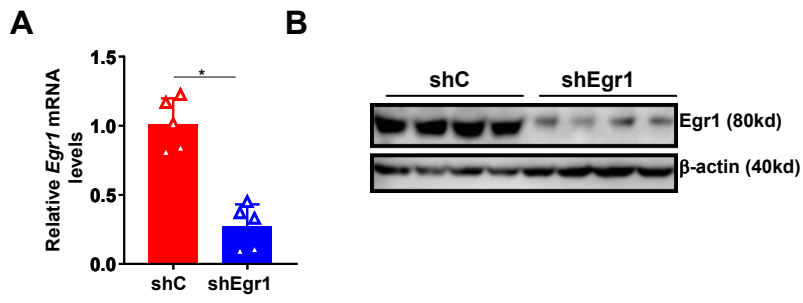

**Fig. S9:** Lentivirus carrying shRNA targeting Egr1 (Lenti-shEgr1) or a control shRNA (Lenti-shC) was injected into *db/db* mice. Egr1 expression was examined by qPCR and western blotting.

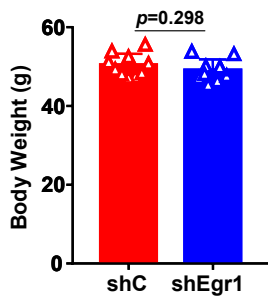

**Fig. S10:** Lentivirus carrying shRNA targeting Egr1 (Lenti-shEgr1) or a control shRNA (Lenti-shC) was injected into *db/db* mice. Egr1 knockdown did not alter body weight of the mice.

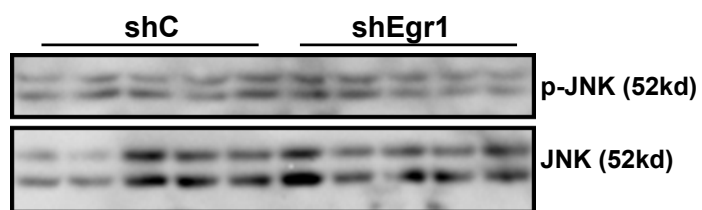

**Fig. S11:** Lentivirus carrying shRNA targeting Egr1 (Lenti-shEgr1) or a control shRNA (Lenti-shC) was injected into *db/db* mice. JNK expression and phosphorylation were examined by western blotting.

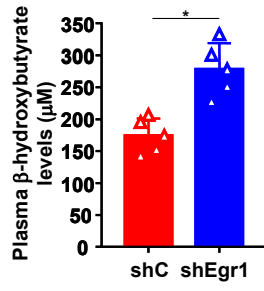

**Fig. S12:** Lentivirus carrying shRNA targeting Egr1 (Lenti-shEgr1) or a control shRNA (Lenti-shC) was injected into *db/db* mice. Plasma β-hydroxybutyrate was measured by a commercially available kit.

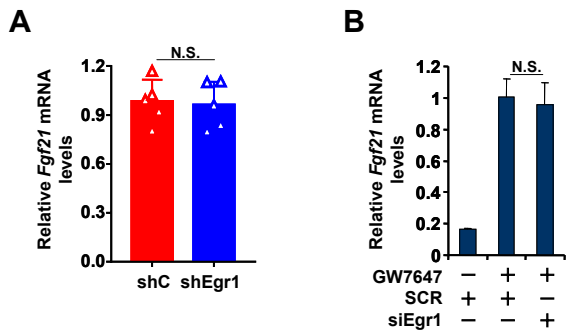

**Fig. S13:** (A) Lentivirus carrying shRNA targeting Egr1 (Lenti-shEgr1) or a control shRNA (Lenti-shC) was injected into *db/db* mice. Hepatic FGF21 expression was examined by qPCR. (B) Murine primary hepatocytes were transfected with siRNA targeting Egr1 or scrambled siRNAs (SCR) followed by treatment with GW7647 (0.1  $\mu$ M). FGF21 expression was examined by qPCR.

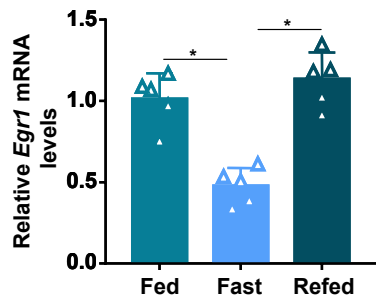

**Fig. S14:** C57/B6 mice were subjected to 12h of fasting followed by 12h of re-feeding. Hepatic Egr1 expression was examined by qPCR.

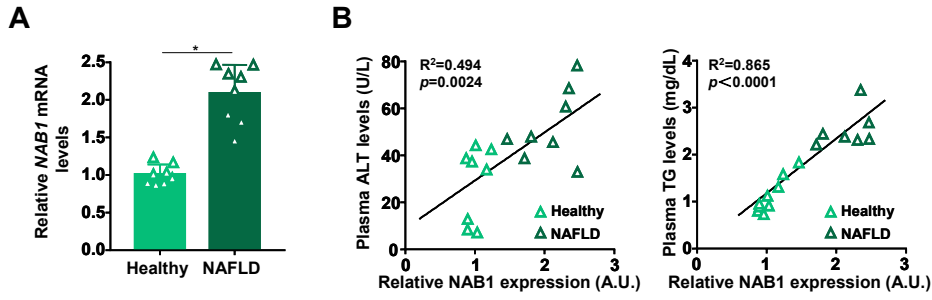

**Fig. S15:** Nab1 expression levels in the livers of NASH patients and healthy individuals were examined by qPCR. Linear regression was performed by Graphpad Prism. N=8 cases for each group.
